# Supplementary material for: Tuning the excited-state intramolecular proton transfer (ESIPT) process of indole–pyrrole systems by π-conjugation and substitution effects: experimental and computational studies
Source: Royal Society of Chemistry journal article supplement (doi:10.1039/c9cp05064g), 2019-12-06
Supplement: c9cp05064g1.pdf [file c9cp05064g1.pdf]

## **Tuning Excited-State Intramolecular Proton Transfer (ESIPT) process of indole-pyrrole systems by $\pi$ -conjugation and substitution effects: Experimental and Computational studies**

Nuonuo Zhang,<sup>a,c</sup> Tingting Zhang,<sup>a</sup> Liu Wen,<sup>a</sup> Long Wang,<sup>a</sup> Jiaying Yan,<sup>a,b,\*</sup> Kaibo Zheng<sup>a\*</sup>

<sup>a</sup>College of Materials and Chemical Engineering, Key Laboratory of Inorganic Nonmetallic Crystalline and Energy Conversion Materials, China Three Gorges University, Hubei, Yichang 443002, PR China

<sup>b</sup>State Key Laboratory of Coordination Chemistry, Nanjing University, Jiangsu, Nanjing 210093, PR China

<sup>c</sup>Material Analysis and Testing Center, China Three Gorges University, Hubei, Yichang 443002, PR China

\*Corresponding authors. E-mail addresses: [yanjiaying327@126.com](mailto:yanjiaying327@126.com); [zhengkbo@126.com](mailto:zhengkbo@126.com)

### Contents

|                                                  |   |
|--------------------------------------------------|---|
| 1 Tables and figures .....                       | 2 |
| 2 Detailed Synthesis and Characterizations ..... | 8 |
| 3 Procedure for the Synthesis of BNDABs.....     | 8 |

# 1 Tables and figures

**Table S1** Experimental <sup>1</sup>H NMR chemical shifts of the N-H hydrogen in CDCl<sub>3</sub>

| Compounds                 | N1-H Chemical Shift (ppm) |
|---------------------------|---------------------------|
| <b>NDAB-H<sup>a</sup></b> | 15.78                     |
| <b>NDAB-6<sup>a</sup></b> | 16.30                     |
| <b>BNDAB-1</b>            | 16.33                     |
| <b>BNDAB-2</b>            | 16.93                     |
| <b>BNDAB-3</b>            | 15.89                     |
| <b>BNDAB-4</b>            | 16.40                     |

<sup>a</sup>Data obtained from Ref: *Res Chem Intermed* (2017) 43, 5337-5344 and *Journal of Molecular Liquids* 286 (2019) 110887.

**Table S2** Photophysical properties of AIE 1-4 in different solvents at room temperature.

| Comp.                     | Solvent | $\lambda_{\text{abs}}$ ( $\epsilon/10^5 \text{ M}^{-1} \text{ cm}^{-1}$ )(nm) | $\lambda_{\text{ex}}$ (nm) | $\lambda_{\text{em}}$ (nm) | $\square \square \Delta \nu$ |                      | $\Phi_{\text{f a}}$ (%) | $\tau_{\text{exp/ns}}$ (pre-exp. factor) <sup>c</sup> |
|---------------------------|---------|-------------------------------------------------------------------------------|----------------------------|----------------------------|------------------------------|----------------------|-------------------------|-------------------------------------------------------|
|                           |         |                                                                               |                            |                            | (nm)                         | ( $\text{cm}^{-1}$ ) |                         |                                                       |
| <b>NDAB-H<sup>b</sup></b> | Toluene | 305 (2.28),<br>415 (1.40)                                                     | 415                        | 580                        | 165                          | 6855                 | 6.0                     | 580 nm: 0.49<br>(700.3), 5.58<br>(15.3)               |
|                           | DCM     | 303 (3.07),<br>411 (1.71)                                                     | 411                        | 578                        | 167                          | 7030                 | 5.1                     |                                                       |
|                           | MeOH    | 300 (3.42),<br>410 (1.83)                                                     | 410                        | 580                        | 170                          | 7149                 | 2.8                     |                                                       |
|                           | DMSO    | 307 (3.98),<br>416 (2.07)                                                     | 416                        | 584                        | 168                          | 6915                 | 11.2                    |                                                       |
| <b>NDAB-6<sup>b</sup></b> | Toluene | 404 (4.23)                                                                    | 404                        | 580                        | 176                          | 7511                 | 22                      | 570 nm: 0.78<br>(4010.9), 4.99<br>(22.7)              |
|                           | DCM     | 299 (1.46),<br>400 (2.89)                                                     | 400                        | 575                        | 175                          | 7609                 | 27                      |                                                       |
|                           | MeOH    | 307 (0.74),<br>397 (2.14)                                                     | 397                        | 573                        | 176                          | 7737                 | 14                      |                                                       |
|                           | DMSO    | 309 (2.34),<br>400 (4.43)                                                     | 400                        | 579                        | 179                          | 7729                 | 28                      |                                                       |
| <b>BNDAB-1</b>            | Toluene | 339 (0.39),<br>437 (0.28)                                                     | 420                        | 510,<br>596                | 73,<br>159                   | 3275,<br>6105        | 20                      | 500 nm: 1.28<br>(285.2);<br>590 nm: 1.20<br>(884.5)   |
|                           | DCM     | 331 (0.43),<br>433 (0.31)                                                     |                            | 520,<br>595                | 97,<br>162                   | 3864,<br>6288        | 15                      |                                                       |
|                           | MeOH    | 329 (0.38),<br>431 (0.26)                                                     |                            | 526,<br>592                | 95,<br>161                   | 4190,<br>6310        | 8                       |                                                       |
|                           | DMSO    | 330 (0.42),<br>438 (0.27)                                                     |                            | 536,<br>596                | 98,<br>158                   | 4174,<br>6053        | 32                      |                                                       |
| <b>BNDAB-2</b>            | Toluene | 416 (0.13)                                                                    | 410                        | 590                        | 174                          | 7089                 | 60                      | 580 nm: 2.16<br>(504.1)                               |
|                           | DCM     | 411 (0.18)                                                                    |                            | 584                        | 173                          | 7208                 | 62                      |                                                       |

|                |         |                           |     |             |             |               |    |                                                     |
|----------------|---------|---------------------------|-----|-------------|-------------|---------------|----|-----------------------------------------------------|
|                | MeOH    | 407 (0.15)                |     | 580         | 173         | 7329          | 27 |                                                     |
|                | DMSO    | 409 (0.15)                |     | 589         | 180         | 7472          | 40 |                                                     |
| <b>BNDAB-3</b> | Toluene | 336 (0.25),<br>430 (0.25) | 410 | 530,<br>596 | 100,<br>166 | 4388,<br>6477 | 10 | 530 nm: 0.65<br>(178.5);<br>590 nm: 0.57<br>(545.7) |
|                | DCM     | 327 (0.23),<br>473 (0.30) |     | 510,<br>593 | 37,<br>120  | 1534,<br>4278 | 11 |                                                     |
|                | MeOH    | 326 (0.29),<br>423 (0.27) |     | 520,<br>590 | 97,<br>167  | 4410,<br>6692 | 4  |                                                     |
|                | DMSO    | 328 (0.31),<br>429 (0.26) |     | 528,<br>593 | 99,<br>164  | 4371,<br>6447 | 11 |                                                     |
| <b>BNDAB-4</b> | Toluene | 400 (0.50)                | 400 | 502,<br>546 | 102,1<br>46 | 5080,<br>6685 | 9  | 500 nm: 1.56<br>(202.1);<br>540 nm: 1.23<br>(372.4) |
|                | DCM     | 402 (0.49)                |     | 546         | 144         | 6561          | 2  |                                                     |
|                | MeOH    | 396 (0.62)                |     | 543         | 147         | 6836          | 1  |                                                     |
|                | DMSO    | 401 (0.54)                |     | 547         | 146         | 6656          | 6  |                                                     |

Footnote: <sup>a</sup>Fluorescence quantum yields were calculated using Rhodamine B ( $\Phi_f = 0.49$  in ethanol) or fluorescein ( $\Phi_f = 0.90$  in 0.1 N NaOH aqueous solution) as the reference. <sup>b</sup>The data are from Ref: Res Chem Intermed (2017) 43, 5337–5344 and Journal of Molecular Liquids 286 (2019) 110887. <sup>c</sup> Measured in Toluene at room temperature.

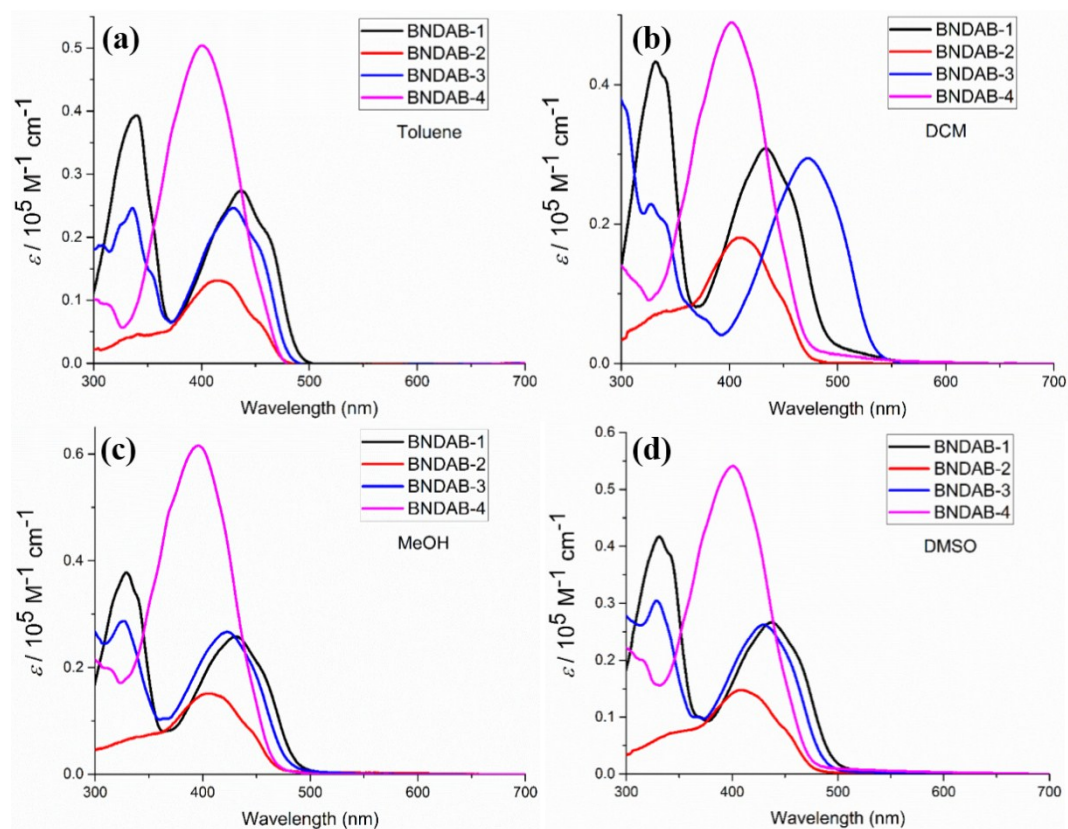

Fig. S1 UV-Vis spectra of **BNDAB-1-4** in toluene (a), DCM (b), MeOH (c), DMSO (d)

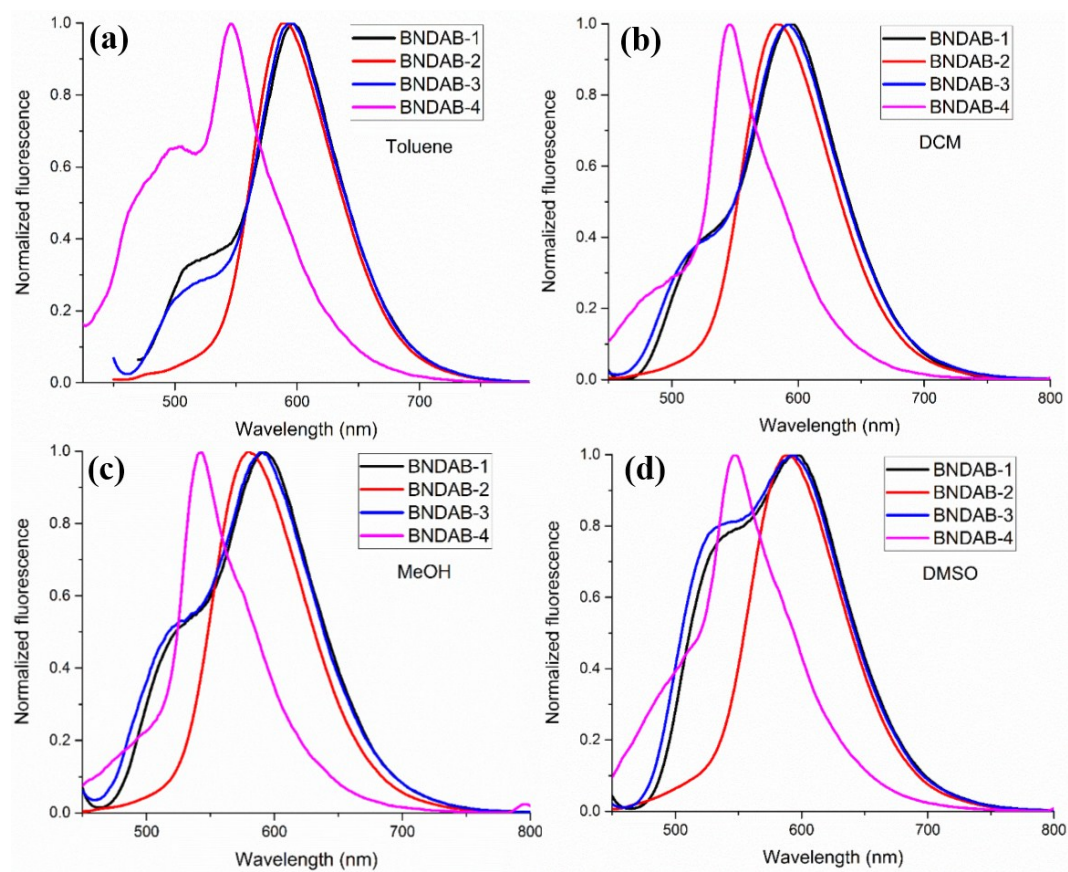

Fig. S2 Emission spectra of **BNDAB-1-4** in toluene (a), DCM (b), MeOH (c), DMSO (d)

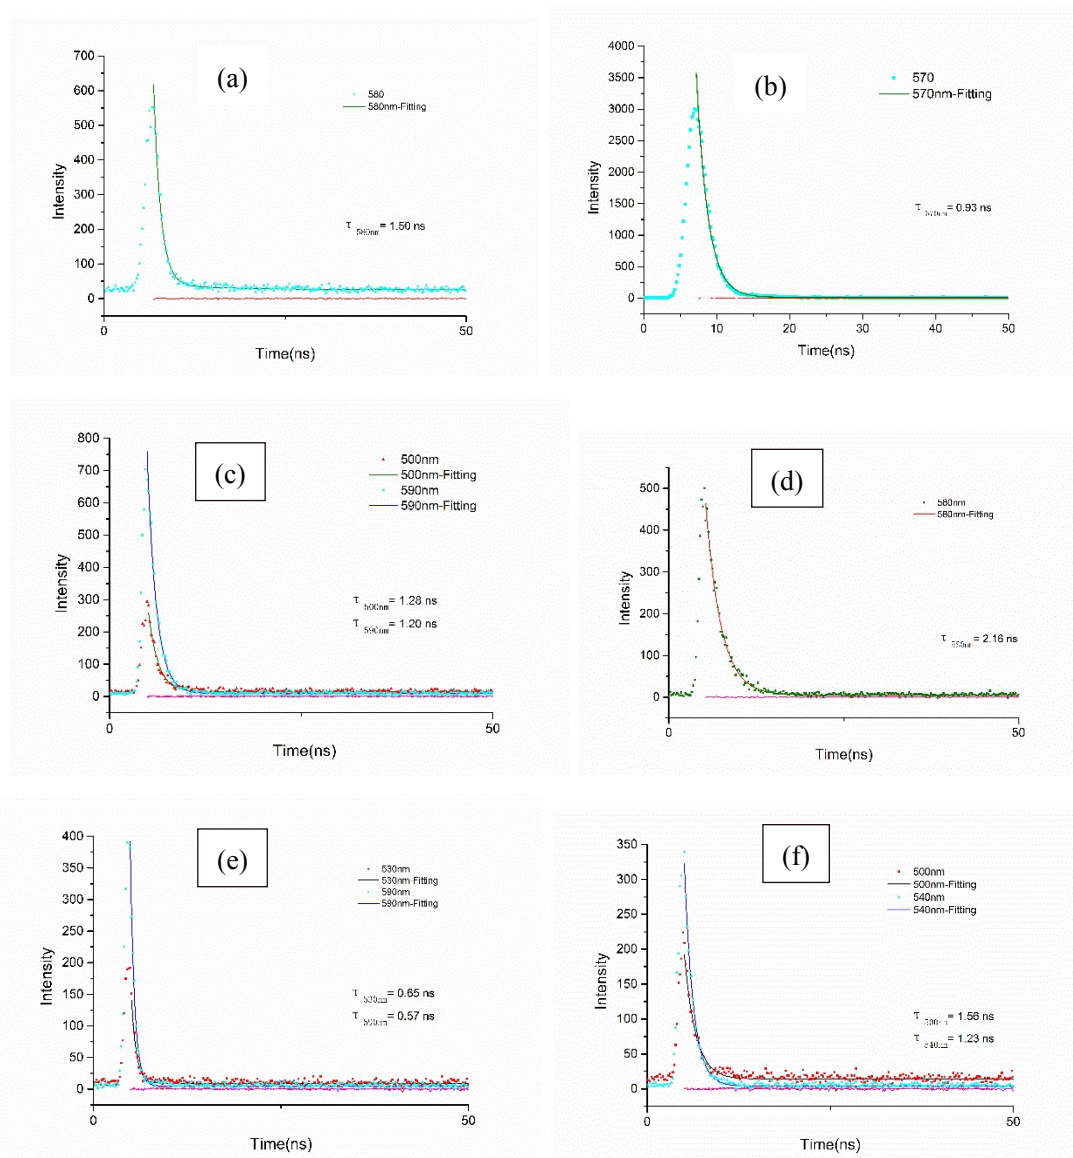

Fig. 3 The fluorescence decay dynamics in toluene of (a) NDAB-H, (b) NDAB-6, (c) BNDAB-1, (d) BNDAB-2, (e) BNDAB-3, (f) BNDAB-4. Squares (red or cyan) denote data points obtained for normal and/or tautomer emissions, respectively, with monitored wavelengths as depicted, while solid lines correspond to nonlinear fitting curves.

**Table S3** The experiment absorption data and calculation data of **BNDABs** in toluene based on TDDFT calculations

| Comp.          | Observed $\lambda_{\text{abs}}$ (nm)<br>( $\epsilon/10^4 \text{ M}^{-1} \text{ cm}^{-1}$ ) | Computed $\lambda_{\text{abs}}$ (nm)(f)     |
|----------------|--------------------------------------------------------------------------------------------|---------------------------------------------|
| <b>BNDAB-1</b> | 339 (0.39), 437 (0.28)                                                                     | 343.78 (0.49), 455.65 (0.42)                |
| <b>BNDAB-2</b> | 416 (0.13)                                                                                 | 347.83 (0.24), 416.84 (0.23), 446.33 (0.75) |
| <b>BNDAB-3</b> | 336 (0.25), 430 (0.25)                                                                     | 338.62 (0.36), 446.32 (0.48)                |
| <b>BNDAB-4</b> | 400 (0.50)                                                                                 | 309.37 (0.17), 410.61 (0.34), 437.03 (0.78) |

**Table S4** Bond distance and angle of **NDABs** in toluene in N-S<sub>0</sub>, N-S<sub>1</sub>, T-S<sub>1</sub> states based on DFT and TDDFT calculations

|                | Category | N-S <sub>0</sub> | T-S <sub>0</sub> | N-S <sub>1</sub> | T-S <sub>1</sub> | N-S <sub>1</sub> -<br>N-S <sub>0</sub> |
|----------------|----------|------------------|------------------|------------------|------------------|----------------------------------------|
| <b>NDAB-H</b>  | N-H(Å)   | 1.03514          | 1.50940          | 1.06097          | 1.63142          | 0.02583                                |
|                | N...H(Å) | 1.74973          | 1.10522          | 1.65512          | 1.06747          | -0.09461                               |
|                | Angle(°) | 151.76075        | 159.35021        | 155.75502        | 157.47575        | 3.99427                                |
| <b>NDAB-6</b>  | N-H(Å)   | 1.03819          | 1.50934          | 1.06721          | 1.67293          | 0.02902                                |
|                | N...H(Å) | 1.73839          | 1.10613          | 1.61522          | 1.05139          | -0.12317                               |
|                | Angle(°) | 151.96211        | 159.42846        | 155.61430        | 155.40165        | 3.65219                                |
| <b>BNDAB-1</b> | N-H(Å)   | 1.03454          | 1.52039          | 1.05392          | 1.62218          | 0.01938                                |
|                | N...H(Å) | 1.75664          | 1.10021          | 1.68201          | 1.06984          | -0.07463                               |
|                | Angle(°) | 152.40036        | 159.56897        | 155.35287        | 158.13365        | 2.95251                                |
| <b>BNDAB-2</b> | N-H(Å)   | 1.03767          | 1.52508          | 1.05895          | 1.66219          | 0.02128                                |
|                | N...H(Å) | 1.74555          | 1.09961          | 1.65368          | 1.05481          | -0.09187                               |
|                | Angle(°) | 152.60301        | 159.56124        | 155.66623        | 156.48710        | 3.06322                                |
| <b>BNDAB-3</b> | N-H(Å)   | 1.03483          | 1.48077          | 1.05699          | 1.61305          | 0.02216                                |
|                | N...H(Å) | 1.74901          | 1.11745          | 1.66401          | 1.07160          | -0.085                                 |
|                | Angle(°) | 151.63230        | 159.71596        | 155.06347        | 157.96968        | 3.43117                                |
| <b>BNDAB-4</b> | N-H(Å)   | 1.03830          | 1.50015          | 1.06586          | 1.65541          | 0.02756                                |
|                | N...H(Å) | 1.73525          | 1.10956          | 1.62525          | 1.05654          | -0.11                                  |
|                | Angle(°) | 151.93534        | 159.49063        | 155.67335        | 156.21554        | 3.73801                                |

**Table S5** Nonconjugation coefficient ( $\xi$ ) and their corresponding  $\Delta\xi$  from tautomer to normal for **NDAB-H**, **BNDAB-1** and **BNDAB-3** in ground state and excited state

|                | nonconjugation coefficient ( $\xi$ ) |                |                |                | $\Delta\xi$    |                |
|----------------|--------------------------------------|----------------|----------------|----------------|----------------|----------------|
|                | normal                               |                | tautomer       |                | S <sub>0</sub> | S <sub>1</sub> |
|                | S <sub>0</sub>                       | S <sub>1</sub> | S <sub>0</sub> | S <sub>1</sub> |                |                |
| <b>NDAB-H</b>  | 0.08906                              | 0.01454        | 0.06165        | 0.02403        | 0.02741        | 0.00949        |
| <b>BNDAB-1</b> | 0.08669                              | 0.02303        | 0.06070        | 0.03788        | 0.02599        | 0.01485        |
| <b>BNDAB-3</b> | 0.08687                              | 0.02647        | 0.06178        | 0.03915        | 0.02509        | 0.01268        |

**Table S6** Nonconjugation coefficient ( $\xi$ ) and their corresponding  $\Delta\xi$  from tautomer to normal for **NDAB-6**, **BNDAB-2** and **BNDAB-4** in ground state and excited state

|                | nonconjugation coefficient ( $\xi$ ) |                |                |                | $\Delta\xi$    |                |
|----------------|--------------------------------------|----------------|----------------|----------------|----------------|----------------|
|                | normal                               |                | tautomer       |                | S <sub>0</sub> | S <sub>1</sub> |
|                | S <sub>0</sub>                       | S <sub>1</sub> | S <sub>0</sub> | S <sub>1</sub> |                |                |
| <b>NDAB-6</b>  | 0.09402                              | 0.0361         | 0.07182        | 0.03174        | 0.0222         | -0.00436       |
| <b>BNDAB-2</b> | 0.09194                              | 0.00055        | 0.07116        | 0.02693        | 0.02078        | 0.02638        |
| <b>BNDAB-4</b> | 0.09158                              | 0.00933        | 0.0708         | 0.02837        | 0.02078        | 0.01904        |

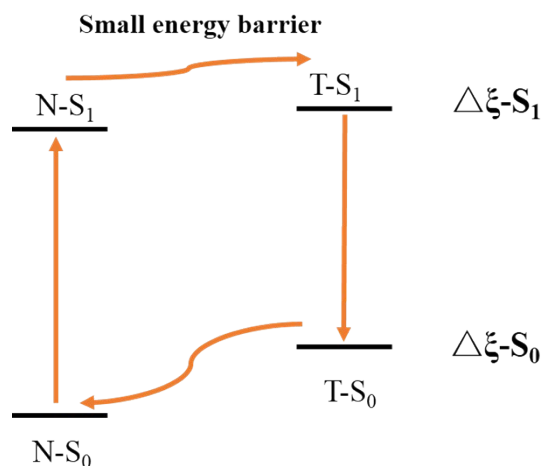

Fig. S4 Schematic graph of energy barrier

**Table S7** The major transition configuration of excited states of **BNDAB-1-4** in toluene

| name           | Wavelength<br>h (nm) | Osc.<br>Strength | Major contribs<br>(>15%)                                 |
|----------------|----------------------|------------------|----------------------------------------------------------|
| <b>BNDAB-1</b> | 455.65               | 0.4179           | HOMO->LUMO (99.6%)                                       |
|                | 343.78               | 0.4926           | H-1->LUMO (25.9%), HOMO->L+1 (72.9%)                     |
| <b>BNDAB-2</b> | 446.33               | 0.7538           | HOMO->LUMO (89.2%)                                       |
|                | 416.84               | 0.2329           | HOMO->L+1 (89.1%)                                        |
|                | 347.83               | 0.2413           | H-1->L+1 (95.8%)                                         |
| <b>BNDAB-3</b> | 446.32               | 0.4795           | HOMO->LUMO (99.5%)                                       |
|                | 338.62               | 0.3757           | H-1->LUMO (57.6%), HOMO->L+2 (37.3%)                     |
| <b>BNDAB-4</b> | 437.03               | 0.7837           | HOMO->LUMO (90.3%)                                       |
|                | 410.61               | 0.3381           | HOMO->L+1 (90.2%)                                        |
|                | 309.37               | 0.17             | H-2->LUMO (52.2%), H-2->L+1 (19.4%),<br>H-1->L+2 (17.0%) |

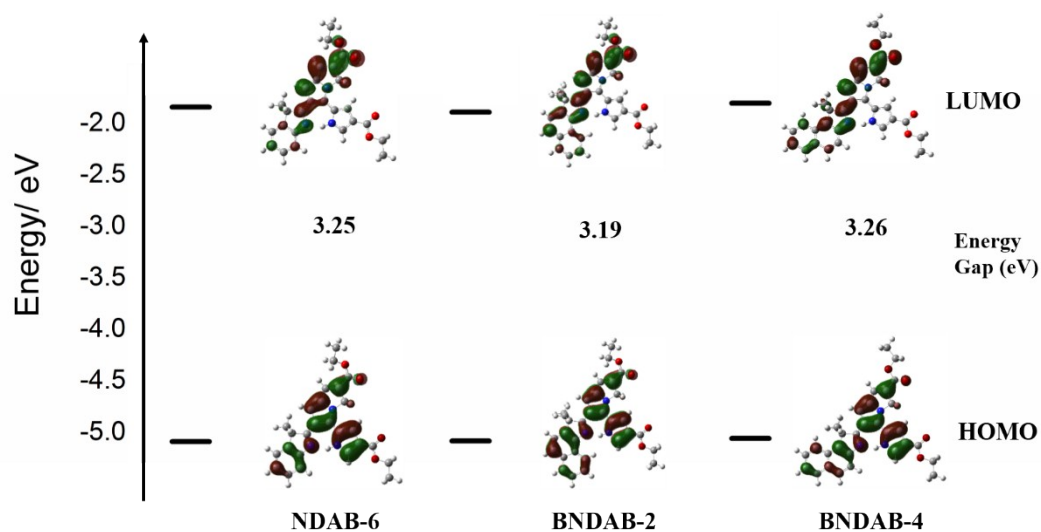

Fig. S5 Computed frontier orbitals for **NDAB-6**, **BNDAB-2**, **BNDAB-4** in their normal form

involved in the first singlet excitation in toluene.

**Table S8** Orbits energy

| compounds      | Energy (eV) |          |          |          |      |
|----------------|-------------|----------|----------|----------|------|
|                | HOMO-1      | HOMO     | LUMO     | LUMO+1   | Gap  |
| <b>NDAB-H</b>  | -0.60491    | -1.29718 | -4.68312 | -5.82274 | 3.39 |
| <b>NDAB-6</b>  | -1.56195    | -1.84304 | -5.09102 | -6.12071 | 3.25 |
| <b>BNDAB-1</b> | -0.65743    | -1.49065 | -4.66026 | -5.47987 | 3.17 |
| <b>BNDAB-2</b> | -1.69936    | -1.89257 | -5.08449 | -5.74382 | 3.19 |
| <b>BNDAB-3</b> | -0.83023    | -1.44602 | -4.66842 | -5.56232 | 3.22 |
| <b>BNDAB-4</b> | -1.6248     | -1.80495 | -5.06    | -5.77947 | 3.26 |

**Table S9** Calculated N-S<sub>0</sub>, T-S<sub>0</sub> states energy of **NDAB-H**, **NDAB-6** and **BNDAB-1-4** and the energy difference between the ground-state normal and tautomer forms ( $\Delta E_3$ ) in toluene based on DFT calculations

| S <sub>0</sub> | normal      | tautomer    | $\Delta E_3$ |
|----------------|-------------|-------------|--------------|
| <b>NDAB-H</b>  | -975.92215  | -975.90860  | 8.5028       |
| <b>BNDAB-1</b> | -1129.56598 | -1129.55238 | 8.5341       |
| <b>BNDAB-3</b> | -1129.56323 | -1129.54938 | 8.6910       |
|                |             |             |              |
| <b>NDAB-6</b>  | -1510.31665 | -1510.30446 | 7.6493       |
| <b>BNDAB-2</b> | -1663.96034 | -1663.94818 | 7.6305       |
| <b>BNDAB-4</b> | -1663.97325 | -1663.96108 | 7.6370       |

Note:  $\Delta E_3$ : the energy difference between the ground-state normal and tautomer forms  $\Delta E$  (eV) =  $E_{T-S_0} - E_{N-S_0}$

**Table S10** Calculated potential energy of **NDABs** in toluene N-S<sub>1</sub>, highest energy in S<sub>1</sub> (H-S<sub>1</sub>) state, T-S<sub>1</sub> states based on DFT and TDDFT calculations

| Entry          | Energy (hartree) |                  |                  | $\Delta E_1$<br>(Kcal/mol) | $\Delta E_2$<br>(Kcal/mol) |
|----------------|------------------|------------------|------------------|----------------------------|----------------------------|
|                | N-S <sub>1</sub> | H-S <sub>1</sub> | T-S <sub>1</sub> |                            |                            |
| <b>NDAB-H</b>  | -975.82197       | -975.81826       | -975.82181       | 0.0992                     | 2.3153                     |
| <b>BNDAB-1</b> | -1129.47262      | -1129.46738      | -1129.47045      | 1.3617                     | 3.2882                     |
| <b>BNDAB-3</b> | -1129.46788      | -1129.46330      | -1129.46614      | 1.0919                     | 2.8740                     |
|                |                  |                  |                  |                            |                            |
| <b>NDAB-6</b>  | -1510.21546      | -1510.21408      | -1510.22160      | -3.8529                    | 0.8660                     |
| <b>BNDAB-2</b> | -1663.86469      | -1663.86173      | -1663.86796      | -2.0520                    | 1.8574                     |
| <b>BNDAB-4</b> | -1663.87539      | -1663.87318      | -1663.87916      | -2.3657                    | 1.3868                     |

Note:  $\Delta E$  (eV) =  $E_{T-S_1} - E_{N-S_1}$ ;  $\Delta E$  (eV) =  $E_{H-S_1} - E_{N-S_1}$



## 2 Detailed Synthesis and Characterizations

All reagents and solvents were obtained from commercial sources and used without further purification, unless otherwise noted. All chromatographic separations were carried out on silica gel (300-400 mesh).  $^1\text{H}$  NMR and  $^{13}\text{C}$  NMR spectra were recorded on Bruker 400 MHz spectrometer at 298 K.  $\text{CDCl}_3$  was used as solvent and TMS as internal reference. The chemical shifts were reported in parts per million ( $\delta$ ) relative to the appropriate reference signal: residual chloroform ( $\delta_{\text{H}}$  7.26). High resolution mass spectra were measured on Bruker APCI instrument or SYNAPT G2 analysis instrument. UV–Vis spectra in various solvents were detected on Shimadzu UV-2600 in 10 mm quartz cell spectrometer. Fluorescence spectra were obtained using a Shimadzu FL-4500 spectrometer, emission wavelengths  $\lambda$  are reported in nm.

## 3 Procedure for the Synthesis of BNDABs

To a mixture of substituted 2,3,3-trimethylbenzoindole (1 mmol), 4-acetyl-2-formylpyrrole or 2-formylpyrrole (2 mmol), AcOH (86  $\mu\text{L}$ , 1.5 mmol) and piperidine (0.1 mL, 1.4 mmol) in toluene (50 mL) was added and the mixture was refluxed for 4 h. The completion of reaction was confirmed by TLC. The brown dark reaction mixture was cooled, concentrated to viscous liquid and chromatographic separation. By column chromatography (silica gel, petroleum/dichloromethane 4:1 to 1:3) to give the corresponding product **BNDABs** as a solid.

**BNDAB-1**: Orange red solid, 130 mg, yield: 36%, 4 h.

$^1\text{H}$  NMR (400 MHz,  $\text{CDCl}_3$ )  $\delta$  = 16.33 (s, 1H), 8.57 (d,  $J=8.3$ , 1H), 7.94 (d,  $J=8.3$ , 1H), 7.75 (d,  $J=8.2$ , 1H), 7.67 (t,  $J=7.2$ , 1H), 7.57 – 7.49 (m, 2H), 7.29 (d,  $J=1.1$ , 1H), 6.81 – 6.76 (m, 2H), 6.69 (d,  $J=1.6$ , 1H), 6.55 (dd,  $J=5.8, 2.5$ , 1H), 6.50 (dt,  $J=6.0, 1.9$ , 1H), 4.76 (s, 2H), 1.71 (s, 6H).  $^{13}\text{C}$  NMR (101 MHz,  $\text{CDCl}_3$ )  $\delta$  = 181.18, 147.61, 142.48, 139.82, 133.91, 129.01, 128.61, 128.44, 126.23, 125.93, 125.55, 125.43, 124.81, 122.99, 122.49, 119.37, 117.91, 115.63, 109.71, 106.72, 99.75, 55.20, 54.90, 25.24. HRMS (ESI) Calcd. for  $\text{C}_{25}\text{H}_{21}\text{N}_3$   $[\text{M}+\text{H}]^+$ : 364.1735, found 364.1800.

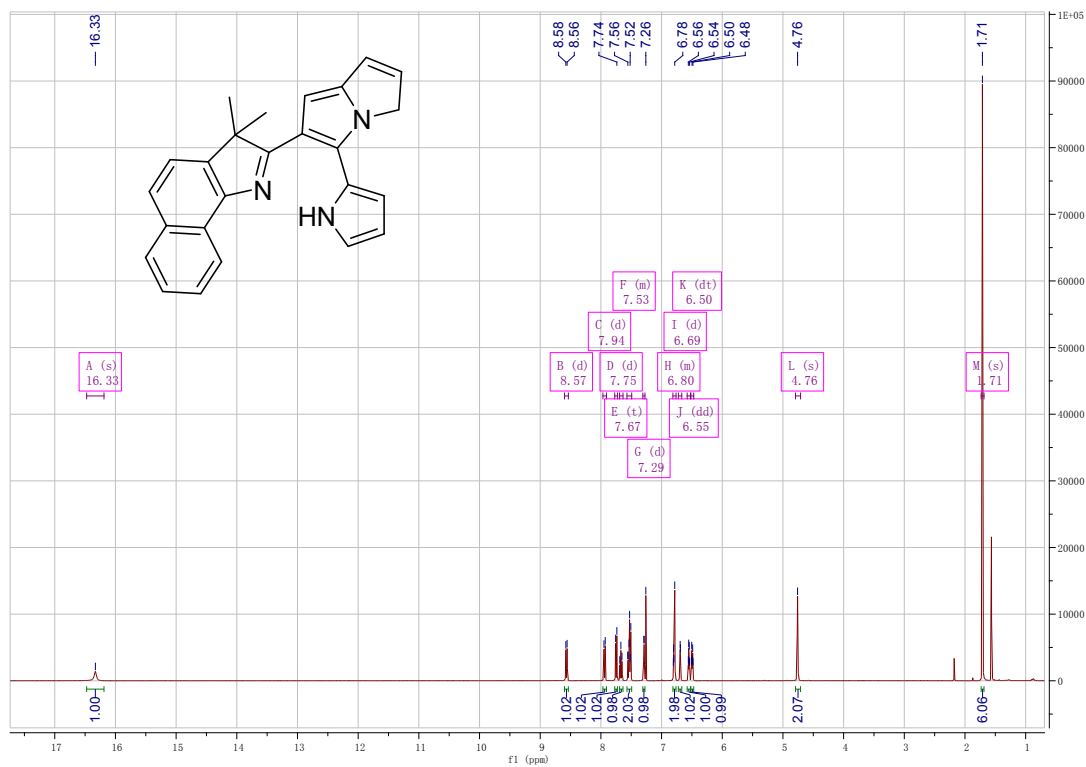

Fig. S6  $^1\text{H}$  NMR spectra of BNDAB-1

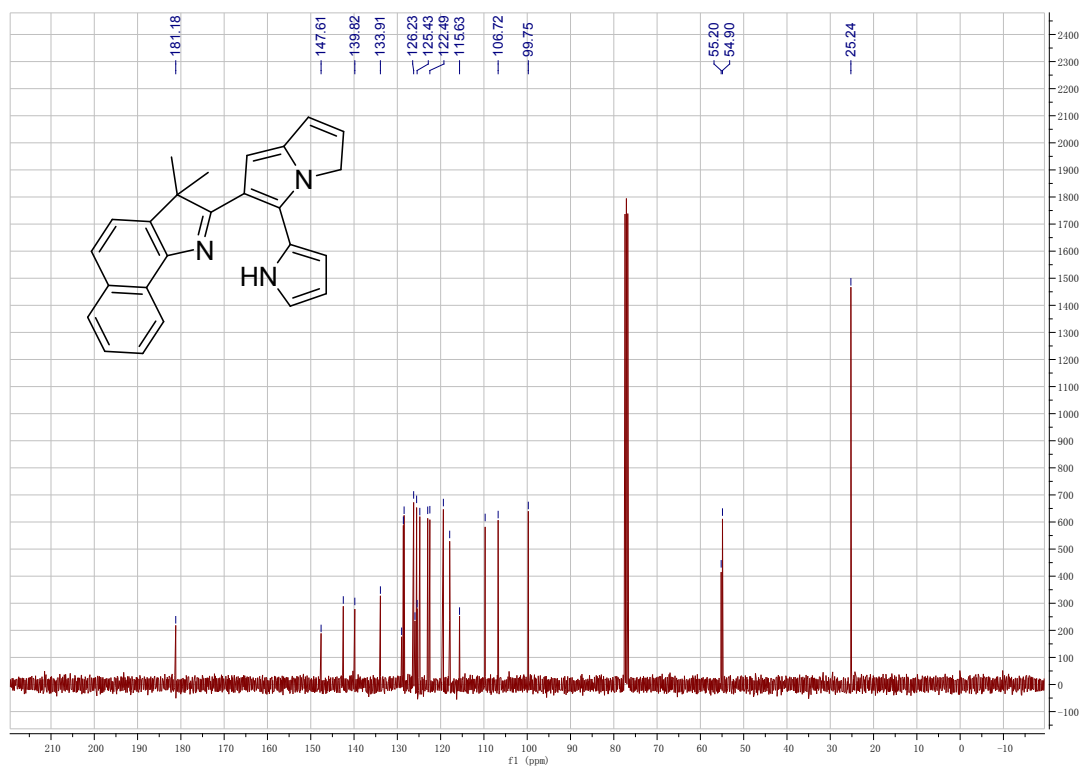

Fig. S7  $^{13}\text{C}$  NMR spectra of BNDAB-1

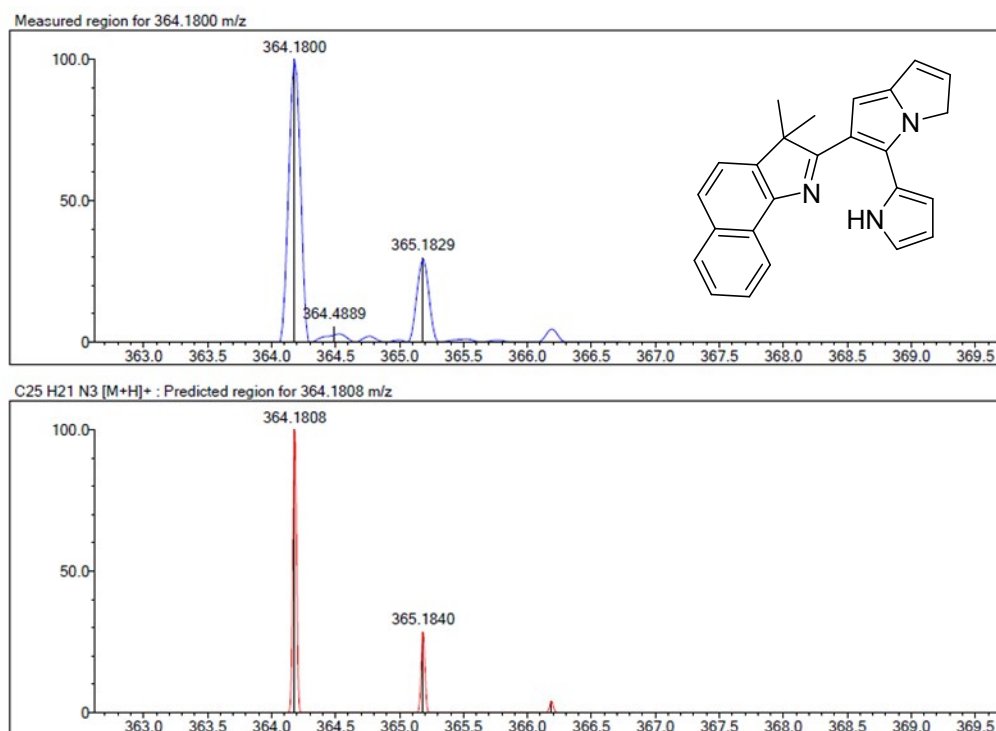

Fig. S8 HRMS (ESI) spectra of **BNDAB-1**

**BNDAB-2:** Orange solid, 142 mg, yield: 28%, 4 h.

<sup>1</sup>H NMR (400 MHz, CDCl<sub>3</sub>) δ 16.93 (s, 1H), 8.46 (d, *J* = 8.2 Hz, 1H), 7.95 (d, *J* = 8.3 Hz, 1H), 7.88 (dd, *J* = 2.7, 1.2 Hz, 1H), 7.79 (d, *J* = 8.2 Hz, 1H), 7.72 – 7.67 (m, 1H), 7.59 (t, *J* = 1.8 Hz, 1H), 7.58 – 7.55 (m, 1H), 7.52 (d, *J* = 8.2 Hz, 1H), 7.15 (s, 1H), 7.06 (s, 1H), 4.98 (s, 2H), 4.38 (dq, *J* = 11.8, 7.1 Hz, 5H), 1.70 (s, 6H), 1.42 (dd, *J* = 4.5, 2.6 Hz, 7H). <sup>13</sup>C NMR (101 MHz, CDCl<sub>3</sub>) δ = 180.41, 165.37, 163.25, 146.70, 142.73, 138.40, 133.89, 131.99, 130.22, 129.26, 128.57, 126.70, 125.86, 125.83, 125.78, 125.62, 123.70, 122.57, 119.27, 117.84, 117.78, 108.53, 105.51, 60.96, 60.08, 55.39, 54.05, 46.02, 25.12, 24.43, 24.42, 22.69, 14.66, 14.48, 8.53, 0.02. HRMS (ESI) Calcd. for C<sub>31</sub>H<sub>29</sub>N<sub>3</sub>O<sub>4</sub> [M+H]<sup>+</sup>: 508.2231, found 508.2218.

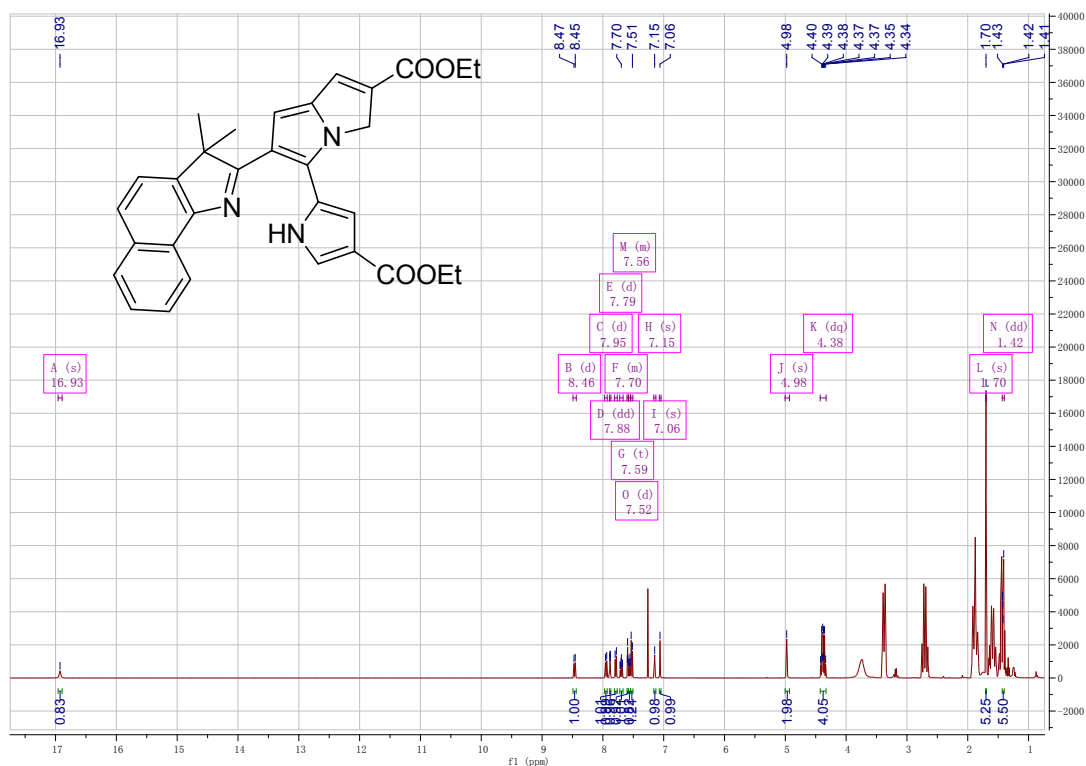

Fig. S9 <sup>1</sup>H NMR spectra of BNDAB-2

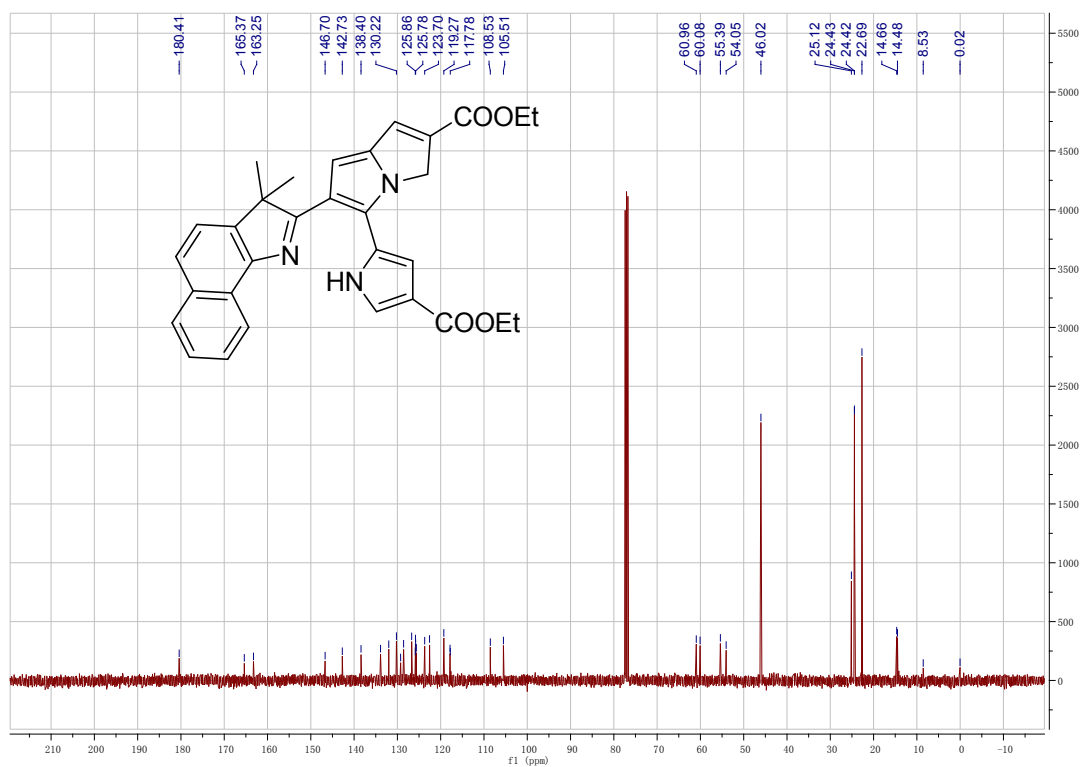

Fig. S10 <sup>13</sup>C NMR spectra of BNDAB-2

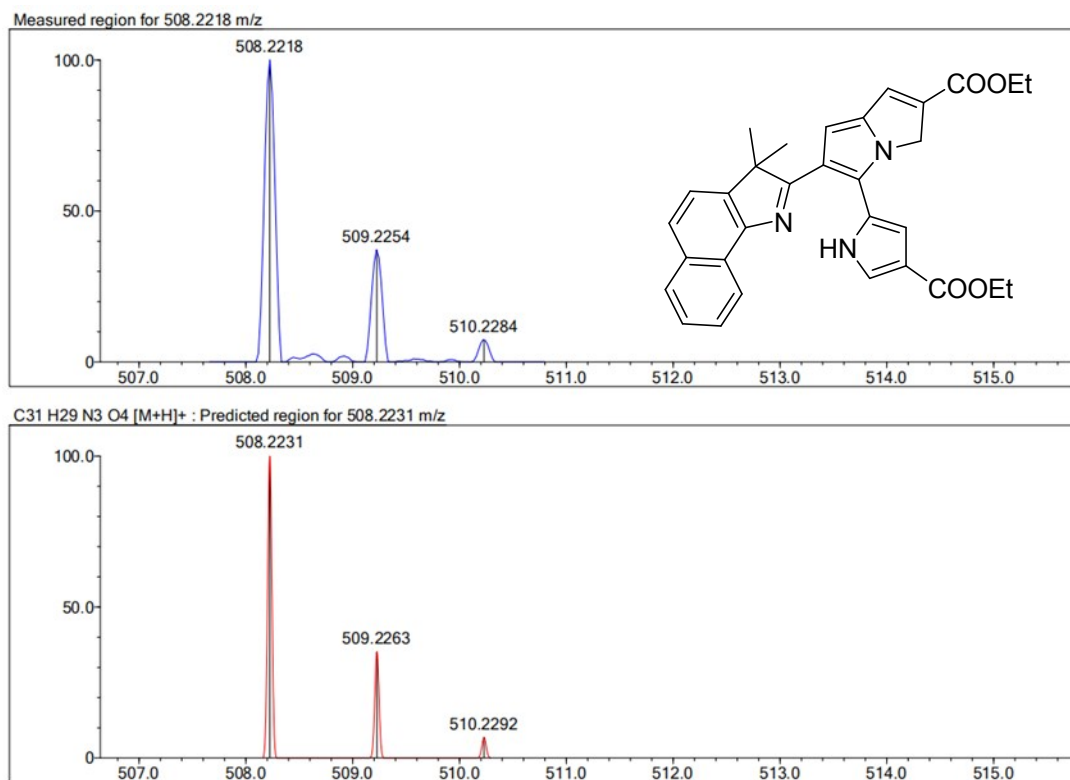

Fig. S11 HRMS (ESI) spectra of **BNDAB-2**

**BNDAB-3:** Orange red solid, 143 mg, yield: 39%, 4 h.

<sup>1</sup>H NMR (400 MHz, CDCl<sub>3</sub>) δ 15.89 (s, 1H), 8.15 (d, *J* = 8.5 Hz, 1H), 7.98 (d, *J* = 8.2 Hz, 1H), 7.89 (q, *J* = 8.5 Hz, 2H), 7.58 (ddd, *J* = 8.3, 6.9, 1.2 Hz, 1H), 7.48 – 7.41 (m, 1H), 7.16 (d, *J* = 1.2 Hz, 1H), 6.83 (s, 1H), 6.80 (dt, *J* = 6.0, 2.1 Hz, 1H), 6.72 – 6.64 (m, 1H), 6.50 (ddt, *J* = 8.0, 6.0, 2.2 Hz, 2H), 4.75 (s, 2H), 1.92 (s, 6H). <sup>13</sup>C NMR (101 MHz, CDCl<sub>3</sub>) δ 183.06, 149.48, 139.72, 139.08, 132.20, 129.88, 129.06, 129.02, 128.57, 128.25, 126.36, 125.29, 123.98, 122.50, 122.48, 119.24, 117.82, 115.10, 109.53, 106.78, 99.74, 55.90, 54.98, 25.04. HRMS (ESI) Calcd. for C<sub>25</sub>H<sub>21</sub>N<sub>3</sub> [M+H]<sup>+</sup>: 364.1735, found 364.1805.

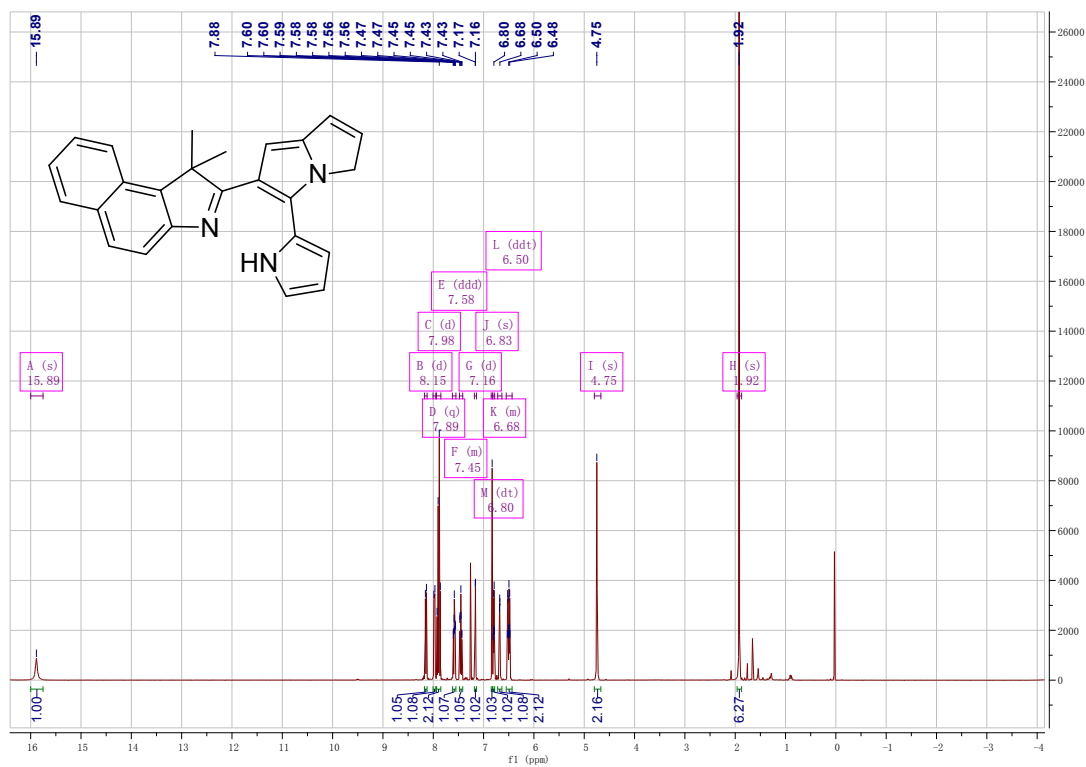

Fig. S12  $^1\text{H}$  NMR spectra of **BNDAB-3**

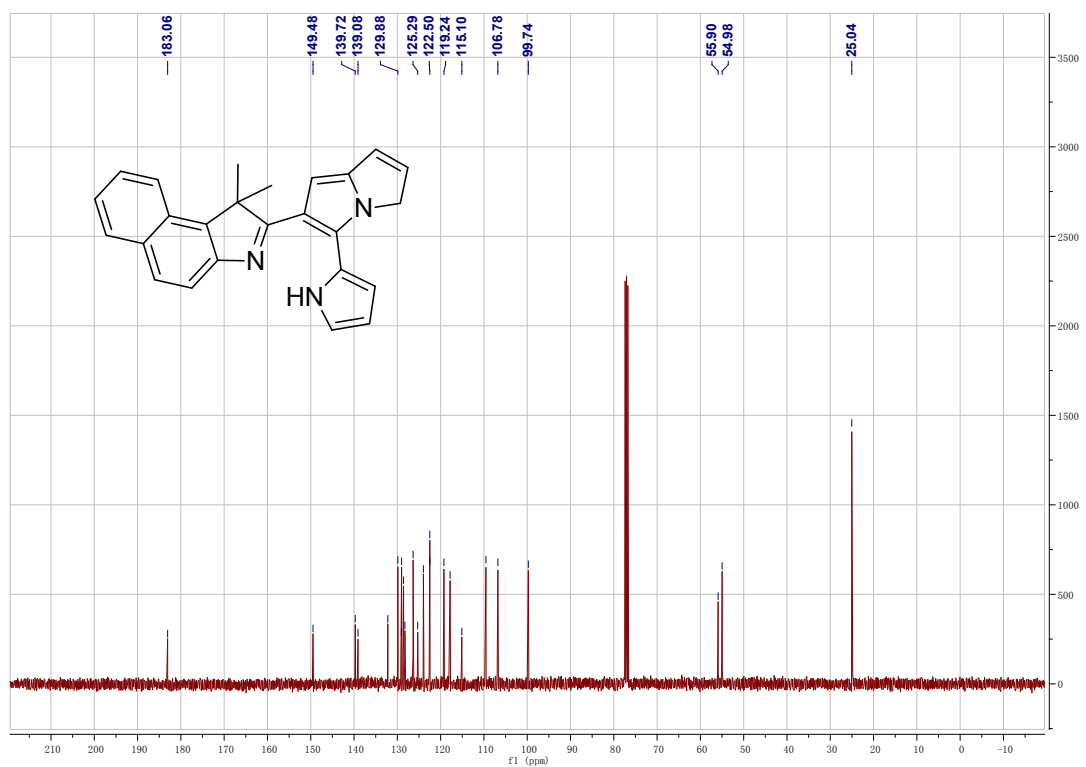

Fig. S13  $^{13}\text{C}$  NMR spectra of **BNDAB-3**

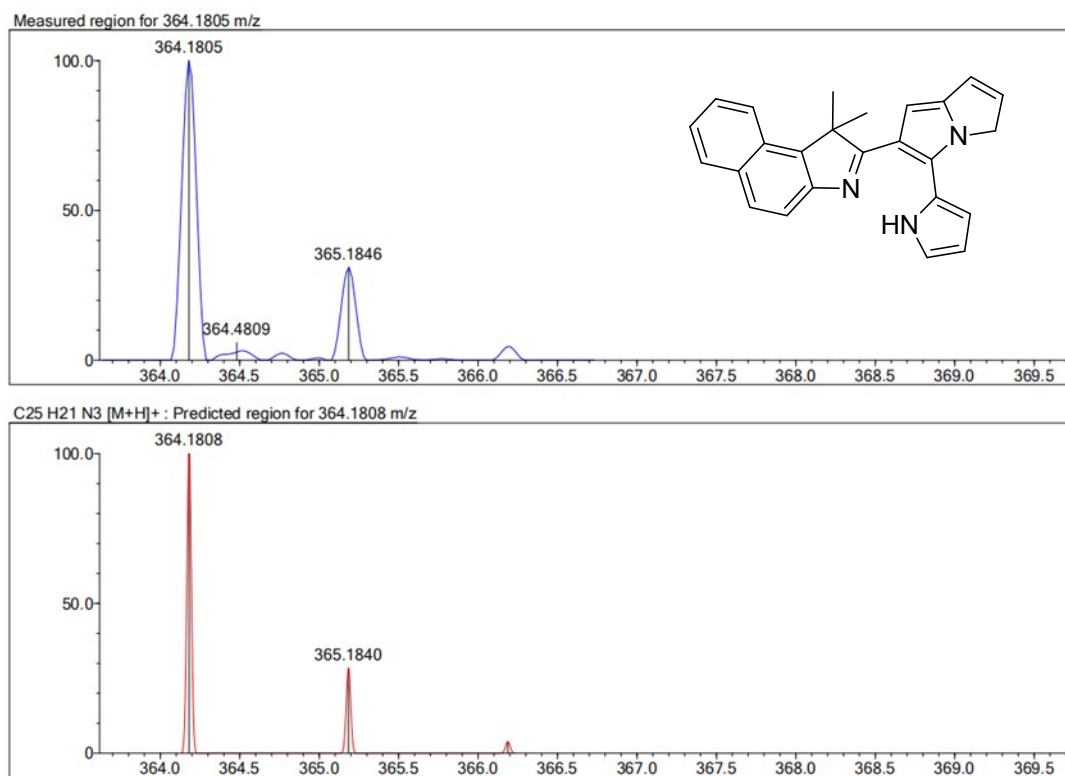

Fig. S14 HRMS (ESI) spectra of **BNDAB-3**

**BNDAB-4**: Orange solid, 113 mg, yield: 22%, 4 h.

<sup>1</sup>H NMR (400 MHz, CDCl<sub>3</sub>) δ = 16.40 (s, 1H), 8.13 (d, *J*=8.4, 1H), 7.98 (d, *J*=8.1, 1H), 7.92 (d, *J*=8.5, 1H), 7.82 (d, *J*=8.5, 1H), 7.74 (s, 1H), 7.59 (t, *J*=1.8, 2H), 7.50–7.44 (m, 1H), 7.13 (s, 1H), 7.10 (s, 1H), 4.97 (s, 2H), 4.37 (dd, *J*=7.1, 2.9, 4H), 1.90 (s, 6H), 1.41 (td, *J*=7.1, 3.3, 6H). <sup>13</sup>C NMR (101 MHz, CDCl<sub>3</sub>) δ 182.20, 165.19, 163.12, 148.56, 139.34, 138.26, 132.48, 131.99, 130.08, 129.93, 129.32, 128.11, 126.62, 125.40, 124.47, 123.58, 122.51, 119.00, 117.73, 117.23, 108.62, 105.40, 60.89, 59.93, 56.06, 54.15, 24.99, 14.63, 14.51. HRMS (ESI) Calcd. for C<sub>31</sub>H<sub>29</sub>N<sub>3</sub>O<sub>4</sub> [M+H]<sup>+</sup>: 508.22318, found 508.2213.

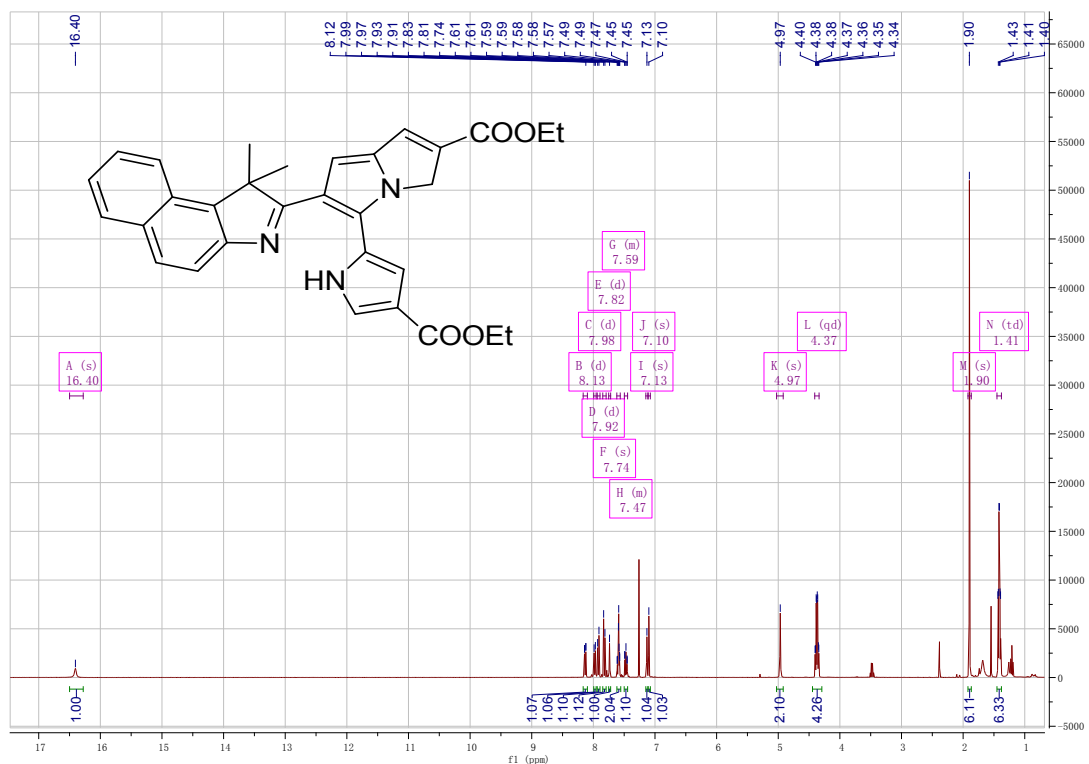

Fig. S15  $^1\text{H}$  NMR spectra of **BNDAB-4**

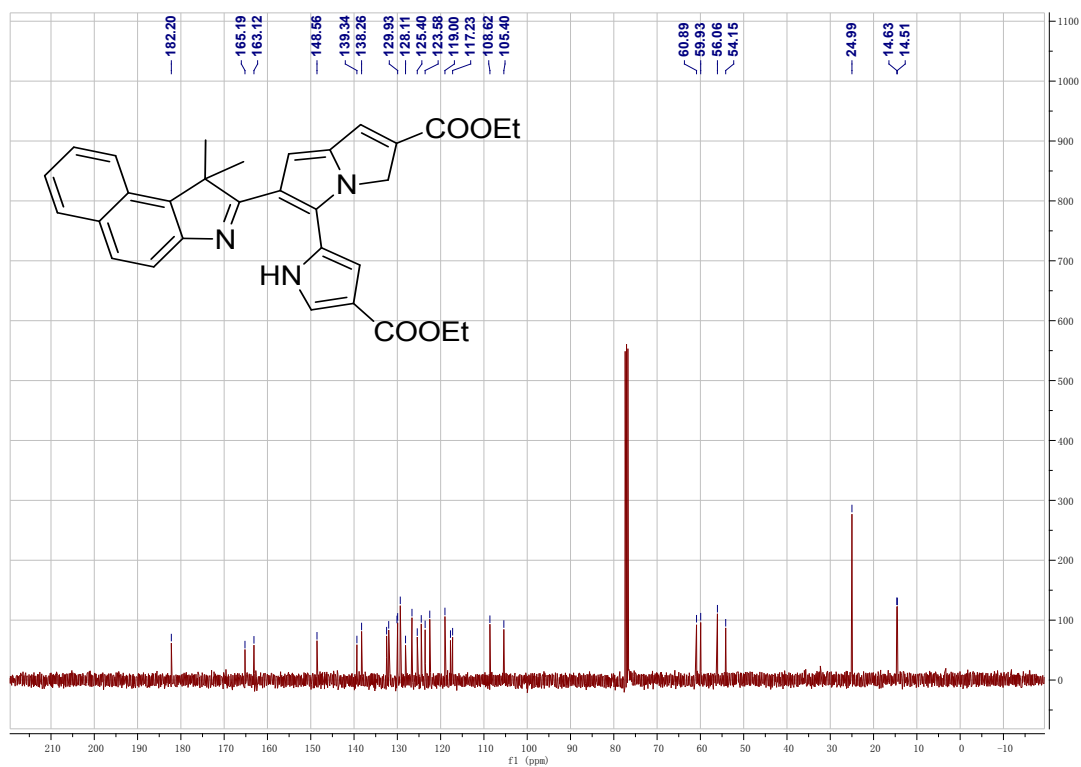

Fig. S16  $^{13}\text{C}$  NMR spectra of **BNDAB-4**



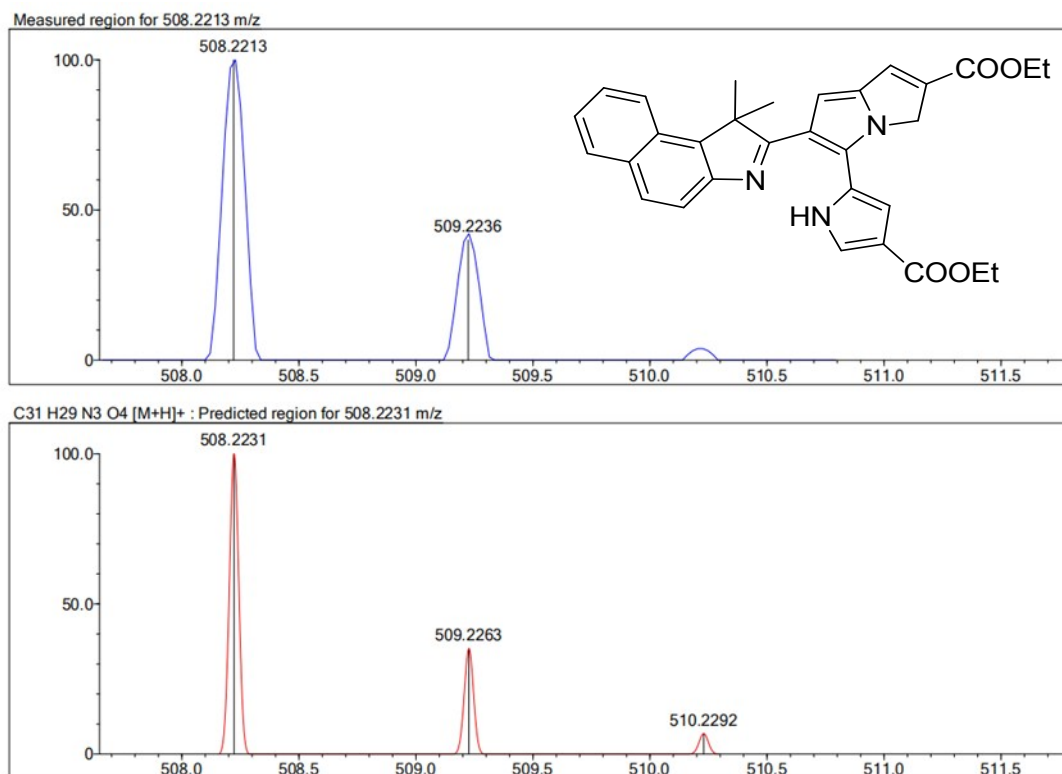

Fig. S17 HRMS (ESI) spectra of **BNDAB-4**
